# Supplementary material for: Development of an integrated model framework for multi-air-pollutant exposure assessments in high-density cities and the implications for epidemiological research
Source: Copernicus journal article supplement (doi:10.5194/egusphere-2023-513), 2023-04-13
Supplement: Supplementary file 1 [file egusphere-2023-513-supplement.pdf]

*Supplement of*

**Development of an integrated model framework for multi-air-pollutant exposure assessments in high-density cities and the implications for epidemiological research**

5 Zhiyuan Li<sup>1,2</sup>, Kin-Fai Ho<sup>3</sup>, Harry Fung Lee<sup>4</sup>, Steve Hung Lam Yim<sup>5,6,7,\*</sup>

<sup>1</sup>Department of Environmental Health, School of Public Health (Shenzhen), Sun Yat-sen University, Guangzhou, China

<sup>2</sup>Institute of Environment, Energy and Sustainability, The Chinese University of Hong Kong, Shatin, N.T., Hong Kong, China

<sup>3</sup>The Jockey Club School of Public Health and Primary Care, The Chinese University of Hong Kong, Shatin, N.T., Hong Kong, China

10 <sup>4</sup>Department of Geography and Resource Management, The Chinese University of Hong Kong, Shatin, N.T., Hong Kong, China

<sup>5</sup>Asian School of the Environment, Nanyang Technological University, Singapore

<sup>6</sup>Lee Kong Chian School of Medicine, Nanyang Technological University, Singapore

<sup>7</sup>Earth Observatory of Singapore, Nanyang Technological University, Singapore

*Correspondence to:* Steve Hung Lam Yim (steve.yim@ntu.edu.sg)

15 **Table of Content**

| No. | Content                           | Page No. |
|-----|-----------------------------------|----------|
| 1   | Supporting Texts (Text S1-S2)     | 2-3      |
| 2   | Supporting Tables (Table S1-S5)   | 4-9      |
| 3   | Supporting Figures (Figure S1-S8) | 10-17    |
| 4   | References                        | 18-19    |

## Supplement Text S1

20 The LUR model requires air pollutant concentration data and data inputs of the potential predictor variables (e.g., the road network and land-use types) affecting air pollutant concentration. The output of the LUR model consists of a linear regression model describing the association between the predictor variables and measured concentration, predicted concentration at the monitoring sites, and the associated measures of the model predictive accuracy (Jin et al., 2019; Lee et al., 2017; Meng et al., 2015).

The form of the LUR model can be written as follows (Cordioli et al., 2017; Liu et al., 2016; Naughton et al., 2018):

$$Y(s, t) = \beta_0(s, t) + \sum_k \beta_{1,k}(s, t) X_k(s, t) + \varepsilon(s, t) \quad (\text{Eq. 1})$$

25 In the above,  $Y(s, t)$  is the observed air pollutant concentration at location  $s$  and time  $t$ ;  $\beta_0$  and  $\beta_{1,k}$  are, respectively, the regression intercept and slope values, which are potentially spatially and temporally varying, but may also be constant in time and space;  $X$  is the independent variable (e.g., population density and urban/building morphology data);  $k$  is the predictor variable type; and  $\varepsilon(s, t)$  is the residual error term at location  $s$  and time  $t$ , representing the unexplained variation in concentration.

## Supplement Text S2

The  $R^2$  value of these LUR models varies a lot between cities, from around 0.20 to above 0.90 (Cai et al., 2020; Li et al., 2021; Hoek et al., 2008; Xu et al., 2019). The performance of recent  $PM_{2.5}$  LUR studies included  $R^2$  values of 0.65 for Shanghai, China (Cai et al., 2020), 0.47 for Southern California, USA (Jones et al., 2020), 0.86 for Beijing, China (Xu et al., 2019), 0.75 for Nanjing, China (Huang et al., 2017), 0.77 for Lanzhou, China (Jin et al., 2019), 0.59 for Hong Kong, China (Lee et al., 2017), and 0.71 for Sabzevar, Iran (Miri et al., 2019). For  $NO_2$  LUR models, the  $R^2$  values were 0.73 for Shanghai, China (Cai et al., 2020), 0.82 for Shanghai, China (Meng et al., 2015), 0.87 for Nanjing, China (Huang et al., 2017), 0.71 for Lanzhou, China (Jin et al., 2019), 0.46 for Hong Kong, China (Lee et al., 2017), 0.66 for Auckland, New Zealand (Ma et al., 2019), and 0.84 for Sydney, Australia (Cowie et al., 2019). Compared with  $PM_{2.5}$  and  $NO_2$ , the number of studies for  $PM_{10}$  and  $O_3$  LUR models is relatively limited.  $PM_{10}$  LUR models have been established with  $R^2$  values of 0.80 in Shanghai, China (Meng et al., 2016), 0.75 in Sabzevar, Iran (Miri et al., 2019), and 0.38 in Mexico City, Mexico (Son et al., 2018), and 0.95 for Manchester, UK (Mölder and Lindley, 2021). The  $R^2$  values for  $O_3$  LUR models were 0.92 for Augsburg, Germany (Wolf et al., 2017), 0.72–0.98 for Tianjin, China (Wang et al., 2020), and 0.65 for Nanjing, China (Huang et al., 2017). The spatial resolution of the air pollution surface depends on the spatial resolution of the input data, and is typically in hundreds of meters of resolution (Cai et al., 2020; Li et al., 2021; Meng et al., 2015; Xu et al., 2019). Recent studies have successfully downscaled the spatial-resolution to finer scales, of tens of meters (Li et al., 2018; Luminati et al., 2021; Ma et al., 2019; Naughton et al., 2018; Son et al., 2018).

**Table S1.** A description of the air quality monitoring stations in Hong Kong.

| Station         | Location                                                    | Station type                                                                   | Sampling height (above the sea level) | Date start operation |
|-----------------|-------------------------------------------------------------|--------------------------------------------------------------------------------|---------------------------------------|----------------------|
| Central/Western | 2 High Street, Sai Ying Pun                                 | Urban: Mixed residential/commercial                                            | 82 m                                  | Nov 1983             |
| Eastern         | 20 Wai Hang Street, Sai Wan Ho                              | Urban: Residential                                                             | 28 m                                  | Jan 1999             |
| Kwun Tong       | 407-431 Kwun Tong Road, Kwun Tong                           | Urban: Mixed residential/commercial/industrial                                 | 37 m                                  | Jul 1983             |
| Sham Shui Po    | 37A Yen Chow Street, Sham Shui Po                           | Urban: Mixed residential/commercial                                            | 21 m                                  | Jul 1984             |
| Kwai Chung      | 999 Kwai Chung Road, Kwai Chung                             | Urban: Mixed residential/commercial/industrial                                 | 19 m                                  | Jul 1988             |
| Tsuen Wan       | 60 Tai Ho Road, Tsuen Wan                                   | Urban: Mixed residential/commercial/industrial                                 | 21 m                                  | Aug 1988             |
| Tseung Kwan O   | 9 Wan Lung Road, Tseung Kwan O, Sai Kung                    | Urban: Residential                                                             | 23 m                                  | Mar 2016             |
| Yuen Long       | 269 Castle Peak Road, Yuen Long                             | New Town: Residential                                                          | 31 m                                  | Jul 1995             |
| Tuen Mun        | 1 Tuen Hi Road, Tuen Mun                                    | New Town: Residential                                                          | 31 m                                  | Dec 2013             |
| Tung Chung      | 6 Fu Tung Street, Tung Chung                                | New Town: Residential                                                          | 34.5 m                                | Apr 1999             |
| Tai Po          | 1 Ting Kok Road, Tai Po                                     | New Town: Residential                                                          | 31 m                                  | Feb 1990             |
| Sha Tin         | 11-17 Man Lai Road, Tai Wai, Sha Tin                        | New Town: Residential                                                          | 31 m                                  | Jul 1991             |
| Tap Mun         | Tap Mun Police Post                                         | Background: Rural                                                              | 26 m                                  | Apr 1998             |
| Causeway Bay    | 1 Yee Woo Street, Causeway Bay                              | Urban Roadside: Mixed commercial/residential area surrounded by tall buildings | 6.5 m [a] / 7 m [b]                   | Jan 1998             |
| Central         | Junction of Des Voeux Road Central and Chater Road, Central | Urban Roadside: Busy commercial/financial area surrounded by tall buildings    | 8.5 m                                 | Oct 1998             |
| Mong Kok        | Junction of Nathan Road and Lai Chi Kok Road, Mong Kok      | Urban Roadside: Mixed commercial/residential area surrounded by tall buildings | 8.5 m [a] / 10.9 m [b]                | Apr 1991             |

45

Note: [a] Sampling height for gaseous pollutants.

[b] Sampling height for suspended particulates.

**Table S2.** Meteorological data and the geo-spatial data used for the LUR modelling.

| <b>Category</b>                  | <b>Variables</b>                                                                                                                       | <b>Buffer size (radius in meters)</b>                                       | <b>Data sources</b>                           |
|----------------------------------|----------------------------------------------------------------------------------------------------------------------------------------|-----------------------------------------------------------------------------|-----------------------------------------------|
| <b>Air quality data</b>          | PM <sub>10</sub> , PM <sub>2.5</sub> , NO <sub>2</sub> , O <sub>3</sub> , etc.                                                         | NA                                                                          | Hong Kong Environmental Protection Department |
| <b>Land use data</b>             | Residential area, farmland, green space, water body, etc.                                                                              | 50 m, 100 m, 300 m, 500 m, 700 m, 1000 m, 2000 m, 3000 m, 4000m, and 5000 m | Hong Kong Planning Department                 |
| <b>Meteorological data</b>       | Temperature, relative humidity, wind speed, wind direction, etc.                                                                       | NA                                                                          | Hong Kong Observatory                         |
| <b>Road network</b>              | Road length, private light bus, bus, car, taxi, van, light duty vehicle, medium duty vehicle, heavy duty vehicle, truck, canyon height | 50 m, 100 m, 300 m, 500 m, 700 m, 1000 m, 2000 m, 3000 m, 4000m, and 5000 m | Hong Kong Transportation Department           |
| <b>Population data</b>           | Population count                                                                                                                       | 50 m, 100 m, 300 m, 500 m, 700 m, 1000 m, 2000 m, 3000 m, 4000m, and 5000 m | Hong Kong Census and Statistics Department    |
| <b>Topography data</b>           | Elevation                                                                                                                              | NA                                                                          | Chinese Academy of Sciences                   |
| <b>Urban/building morphology</b> | Building height, building area                                                                                                         | 50 m, 100 m, 300 m, 500 m, 700 m, 1000 m, 2000 m, 3000 m, 4000m, and 5000 m | Hong Kong Planning Department                 |
| <b>Geo-location</b>              | Longitude, Latitude                                                                                                                    | NA                                                                          | Hong Kong Environmental Protection Department |

**Table S3.** Description of the annual-average LUR models for ambient PM<sub>10</sub>, PM<sub>10</sub> TC, PM<sub>10</sub> NO<sub>3</sub><sup>-</sup>, PM<sub>10</sub> SO<sub>4</sub><sup>2-</sup>, PM<sub>10</sub> Cd, PM<sub>2.5</sub>, NO<sub>2</sub>, and O<sub>3</sub> in Hong Kong.

| Air pollutant                                  | Variable    | Coefficient            | Standard error        | P      | VIF | Predictive accuracy                 |
|------------------------------------------------|-------------|------------------------|-----------------------|--------|-----|-------------------------------------|
| PM <sub>10</sub>                               | Constant    | 24.6                   | 1.46                  | <0.001 | NA  | $R^2 = 0.92$ ; LOOCV $R^2 = 0.77$ . |
|                                                | F_CARVL100  | $1.54 \times 10^{-3}$  | $2.32 \times 10^{-4}$ | <0.001 | 1.1 |                                     |
|                                                | Area_S_100  | $1.15 \times 10^{-3}$  | $1.53 \times 10^{-4}$ | <0.001 | 1.6 |                                     |
|                                                | Res_100     | $8.47 \times 10^{-4}$  | $1.26 \times 10^{-4}$ | <0.001 | 1.4 |                                     |
|                                                | Ind_3000    | $1.73 \times 10^{-6}$  | $4.24 \times 10^{-7}$ | 0.003  | 1.4 |                                     |
|                                                | Ins_4000    | $-1.44 \times 10^{-6}$ | $3.82 \times 10^{-7}$ | 0.004  | 1.7 |                                     |
| PM <sub>10</sub> TC                            | Constant    | 4808                   | 199.4                 | <0.001 | NA  | $R^2 = 0.94$ ; LOOCV $R^2 = 0.73$ . |
|                                                | F_Bus50     | $4.79 \times 10^{-1}$  | $6.40 \times 10^{-2}$ | <0.001 | 1.1 |                                     |
|                                                | F_MHGVVL700 | $6.67 \times 10^{-2}$  | $1.21 \times 10^{-2}$ | 0.001  | 1.1 |                                     |
| PM <sub>10</sub> NO <sub>3</sub> <sup>-</sup>  | Constant    | 2282                   | 169.0                 | <0.001 | NA  | $R^2 = 0.93$ ; LOOCV $R^2 = 0.88$ . |
|                                                | F_CARVL500  | $4.10 \times 10^{-2}$  | $6.76 \times 10^{-3}$ | 0.001  | 1.3 |                                     |
|                                                | Area_S_300  | $9.88 \times 10^{-3}$  | $2.60 \times 10^{-3}$ | 0.007  | 1.3 |                                     |
| PM <sub>10</sub> SO <sub>4</sub> <sup>2-</sup> | Constant    | 6295                   | 95.0                  | <0.001 | NA  | $R^2 = 0.97$ ; LOOCV $R^2 = 0.92$ . |
|                                                | F_TVL100    | $3.66 \times 10^{-2}$  | $2.95 \times 10^{-3}$ | <0.001 | 1.2 |                                     |
|                                                | H_M_700     | 1.49                   | $2.72 \times 10^{-1}$ | 0.002  | 1.1 |                                     |
|                                                | Tra_1000    | $2.76 \times 10^{-4}$  | $1.04 \times 10^{-4}$ | 0.037  | 1.1 |                                     |
| PM <sub>10</sub> Cd                            | Constant    | -19.3                  | 3.73                  | 0.002  | NA  | $R^2 = 0.92$ ; LOOCV $R^2 = 0.76$ . |
|                                                | Tra_2000    | $4.24 \times 10^{-8}$  | $7.28 \times 10^{-9}$ | 0.001  | 1.0 |                                     |
|                                                | Lat         | $8.85 \times 10^{-1}$  | $1.66 \times 10^{-1}$ | 0.002  | 2.3 |                                     |
|                                                | RH_A300     | $3.82 \times 10^{-3}$  | $1.23 \times 10^{-3}$ | 0.021  | 2.3 |                                     |
| PM <sub>2.5</sub>                              | Constant    | 15.6                   | 1.74                  | <0.001 | NA  | $R^2 = 0.91$ ; LOOCV $R^2 = 0.81$ . |
|                                                | F_LGVVL500  | $7.55 \times 10^{-4}$  | $9.03 \times 10^{-5}$ | <0.001 | 3.8 |                                     |
|                                                | Ins_4000    | $-2.68 \times 10^{-6}$ | $4.71 \times 10^{-7}$ | <0.001 | 4.0 |                                     |
|                                                | Res_300     | $5.78 \times 10^{-5}$  | $1.13 \times 10^{-5}$ | 0.001  | 1.3 |                                     |
|                                                | Area_S_50   | $1.92 \times 10^{-3}$  | $4.72 \times 10^{-4}$ | 0.003  | 1.2 |                                     |
|                                                | H_M_100     | $1.67 \times 10^{-2}$  | $6.82 \times 10^{-3}$ | 0.040  | 1.2 |                                     |
| NO <sub>2</sub>                                | Constant    | 9.27                   | 4.61                  | 0.07   | NA  | $R^2 = 0.96$ ; LOOCV $R^2 = 0.93$ . |
|                                                | F_TVL500    | $3.73 \times 10^{-4}$  | $2.79 \times 10^{-5}$ | <0.001 | 1.7 |                                     |
|                                                | POP_100     | $6.62 \times 10^{-4}$  | $1.54 \times 10^{-4}$ | 0.001  | 1.6 |                                     |
|                                                | Ind_1000    | $3.12 \times 10^{-5}$  | $1.17 \times 10^{-5}$ | 0.022  | 1.1 |                                     |
| O <sub>3</sub>                                 | Constant    | -5944                  | 1557                  | 0.003  | NA  | $R^2 = 0.92$ ; LOOCV $R^2 = 0.87$ . |
|                                                | F_TVL700    | $-1.20 \times 10^{-4}$ | $1.55 \times 10^{-5}$ | <0.001 | 1.4 |                                     |
|                                                | Lon         | 52.5                   | 13.6                  | 0.003  | 1.1 |                                     |
|                                                | Ins_300     | $1.18 \times 10^{-4}$  | $5.35 \times 10^{-5}$ | 0.049  | 1.4 |                                     |

- F\_CARVL100, F\_CARVL500: the number of private cars within 100-m and 500-m buffers
- 55 • Area\_S\_50, Area\_S\_100, Area\_S\_300: the area of buildings within 50-m, 100-m, and 300-m buffers
- Res\_100, Res\_300: the area of residential land within 100-m and 300-m buffers
- Ind\_1000, Ind\_3000: the area of industrial land within 1000-m and 3000-m buffers
- Ins\_300, Ins\_4000: the area of urban green space within 300-m and 4000-m buffers
- F\_BUS50: the number of buses within a 50-m buffer
- 60 • F\_MHGVVL700: the number of medium & heavy-duty vehicles within a 700-m buffer
- F\_TVL100, F\_TVL500, F\_TVL700: the number of total vehicles within 100-m, 500-m, and 700-m buffers

- H\_M\_100, H\_M\_700: the maximum building height within 100-m and 700-m buffers
- Tra\_1000, Tra\_2000: the area of transportation land within 1000-m and 2000-m buffers
- RH\_A300: the average canyon height within a 300-m buffer
- 65 • F\_LGVVL500: the number of light-duty vehicles within a 500-m buffer
- POP\_100: the number of people within a 100-m buffer
- Lat and Lon: latitude and longitude
- VIF: the Variance Inflation Factor
- LOOCV: leave-one-out cross-validation
- 70 • NA: not applicable

**Table S4.** Statistical description of concentration estimates of ambient PM<sub>10</sub>, PM<sub>2.5</sub>, NO<sub>2</sub>, O<sub>3</sub> (µg/m<sup>3</sup>), and PM<sub>10</sub> TC, PM<sub>10</sub> NO<sub>3</sub><sup>-</sup>, PM<sub>10</sub> SO<sub>4</sub><sup>2-</sup>, PM<sub>10</sub> Cd (ng/m<sup>3</sup>) for the grid cells using LUR models.

| <b>Air pollutants</b>                          | <b>Mean</b> | <b>Standard deviation</b> | <b>Minimum</b> | <b>Maximum</b> |
|------------------------------------------------|-------------|---------------------------|----------------|----------------|
| PM <sub>10</sub>                               | 27.1        | 7.87                      | 15.3           | 55.0           |
| PM <sub>10</sub> TC                            | 5207        | 997                       | 4808           | 13555          |
| PM <sub>10</sub> NO <sub>3</sub> <sup>-</sup>  | 2607        | 655                       | 2282           | 6867           |
| PM <sub>10</sub> SO <sub>4</sub> <sup>2-</sup> | 6552        | 264                       | 6295           | 8791           |
| PM <sub>10</sub> Cd                            | 0.53        | 0.10                      | 0.28           | 0.90           |
| PM <sub>2.5</sub>                              | 15.4        | 6.77                      | 0.00           | 47.1           |
| NO <sub>2</sub>                                | 17.7        | 16.3                      | 9.27           | 117.3          |
| O <sub>3</sub>                                 | 49.3        | 11.3                      | 0.29           | 89.8           |



75 **Table S5.** The average LUR estimated ambient PM<sub>10</sub>, PM<sub>2.5</sub>, NO<sub>2</sub>, O<sub>3</sub> (µg/m<sup>3</sup>), and PM<sub>10</sub> TC, PM<sub>10</sub> NO<sub>3</sub><sup>-</sup>, PM<sub>10</sub> SO<sub>4</sub><sup>2-</sup>, PM<sub>10</sub> Cd (ng/m<sup>3</sup>) in the eighteen districts of Hong Kong.

| District                     | PM <sub>10</sub> | PM <sub>10</sub> TC | PM <sub>10</sub> NO <sub>3</sub> <sup>-</sup> | PM <sub>10</sub> SO <sub>4</sub> <sup>2-</sup> | PM <sub>10</sub> Cd | PM <sub>2.5</sub> | NO <sub>2</sub> | O <sub>3</sub> |
|------------------------------|------------------|---------------------|-----------------------------------------------|------------------------------------------------|---------------------|-------------------|-----------------|----------------|
| <b>Wong Tai Sin</b>          | 32.04            | 6134                | 3491                                          | 6988                                           | 0.59                | 19.65             | 40.70           | 39.60          |
| <b>Kowloon City</b>          | 31.23            | 6283                | 4065                                          | 6845                                           | 0.62                | 19.26             | 49.88           | 33.20          |
| <b>Kwun Tong</b>             | 35.26            | 5968                | 3750                                          | 6877                                           | 0.62                | 24.93             | 52.48           | 39.57          |
| <b>Sai Kung</b>              | 24.84            | 4862                | 2409                                          | 6472                                           | 0.49                | 13.19             | 12.04           | 61.64          |
| <b>North</b>                 | 27.49            | 5007                | 2455                                          | 6453                                           | 0.62                | 14.73             | 14.58           | 54.37          |
| <b>Central &amp; Western</b> | 29.87            | 5072                | 3367                                          | 7133                                           | 0.53                | 16.52             | 31.50           | 41.80          |
| <b>Wan Chai</b>              | 27.12            | 5123                | 3419                                          | 6926                                           | 0.51                | 14.57             | 31.50           | 42.70          |
| <b>Eastern</b>               | 28.23            | 5029                | 2819                                          | 6823                                           | 0.49                | 14.94             | 21.35           | 53.77          |
| <b>Tuen Mun</b>              | 27.12            | 5472                | 2563                                          | 6510                                           | 0.53                | 15.12             | 16.88           | 41.52          |
| <b>Yuen Long</b>             | 32.24            | 5318                | 2651                                          | 6506                                           | 0.58                | 17.10             | 22.97           | 45.31          |
| <b>Southern</b>              | 25.00            | 4846                | 2535                                          | 6610                                           | 0.40                | 12.64             | 14.15           | 55.70          |
| <b>Islands</b>               | 24.70            | 4840                | 2356                                          | 6490                                           | 0.38                | 14.63             | 10.10           | 43.28          |
| <b>Sham Shui Po</b>          | 36.97            | 8198                | 4588                                          | 6981                                           | 0.66                | 29.33             | 64.98           | 22.80          |
| <b>Yau Tsim Mong</b>         | 36.48            | 7759                | 5101                                          | 7198                                           | 0.68                | 31.56             | 79.78           | 14.35          |
| <b>Kwai Tsing</b>            | 30.56            | 7768                | 3314                                          | 6877                                           | 0.64                | 20.96             | 43.18           | 34.83          |
| <b>Tsuen Wan</b>             | 25.73            | 5451                | 2586                                          | 6722                                           | 0.52                | 15.77             | 17.63           | 45.81          |
| <b>Tai Po</b>                | 25.68            | 5023                | 2456                                          | 6473                                           | 0.56                | 14.72             | 12.87           | 56.28          |
| <b>Sha Tin</b>               | 24.79            | 5349                | 2779                                          | 6710                                           | 0.55                | 13.20             | 18.85           | 50.94          |

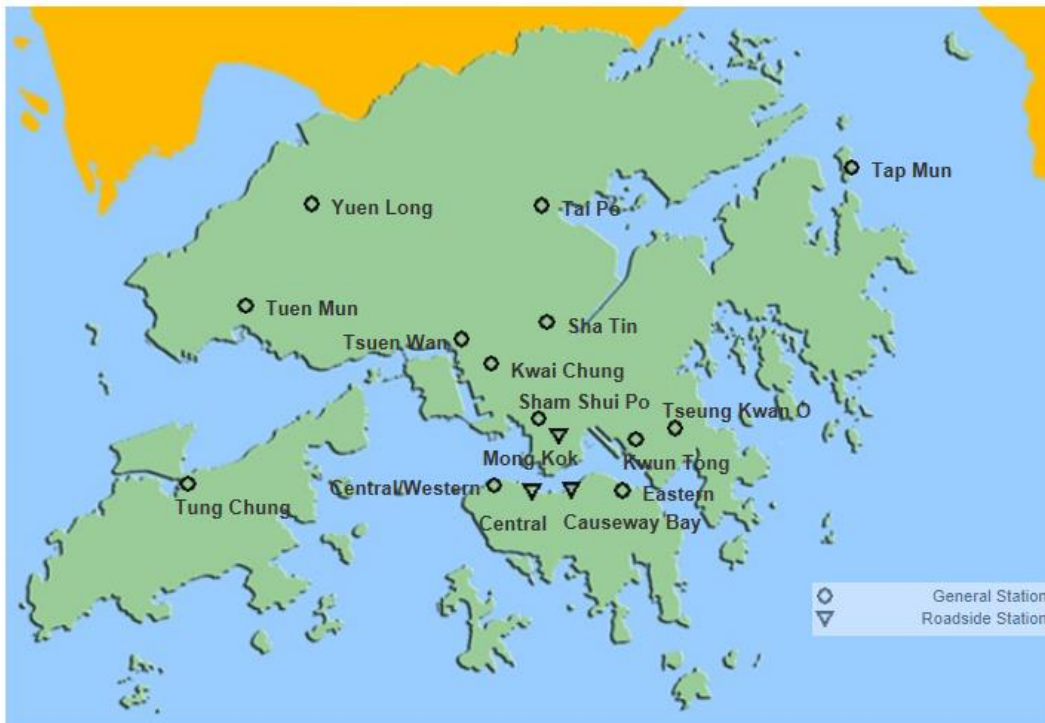

80 **Figure S1.** The location of sixteen air quality monitoring stations (AQMSs) in Hong Kong, of which thirteen are general AQMSs including Yuen Long (YL), Tung Chung (TC), Tsuen Wan (TW), Kwai Chung (KC), Sham Shui Po (SSP), Sha Tin (ST), Tai Po (TP), Tap Mun (TM), Tuen Mun (TUM), Tseung Kwan O (TKO), Kwun Tong (KT), Eastern (EN), Central/Western (CW), and three are roadside AQMSs including Mong Kok (MK), Central (CN), and Causeway Bay (CB).

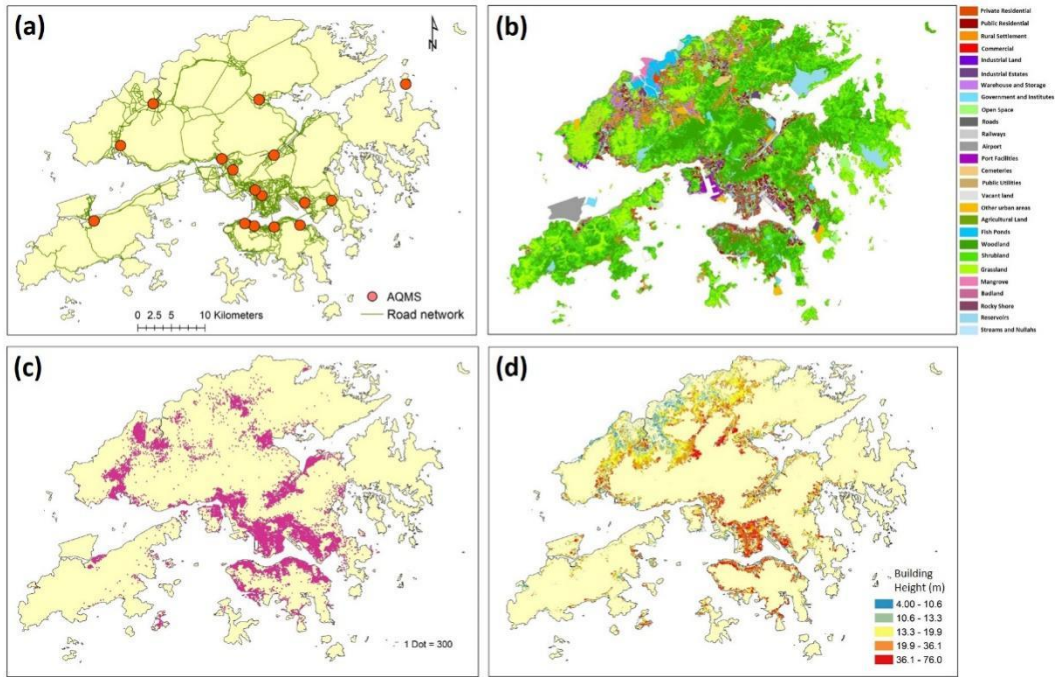

**Figure S2.** The geospatial data within the study area. (a) The road network with the 16 air quality monitoring stations. (b) Land-use types. (c) Population density. (d) Building morphology.

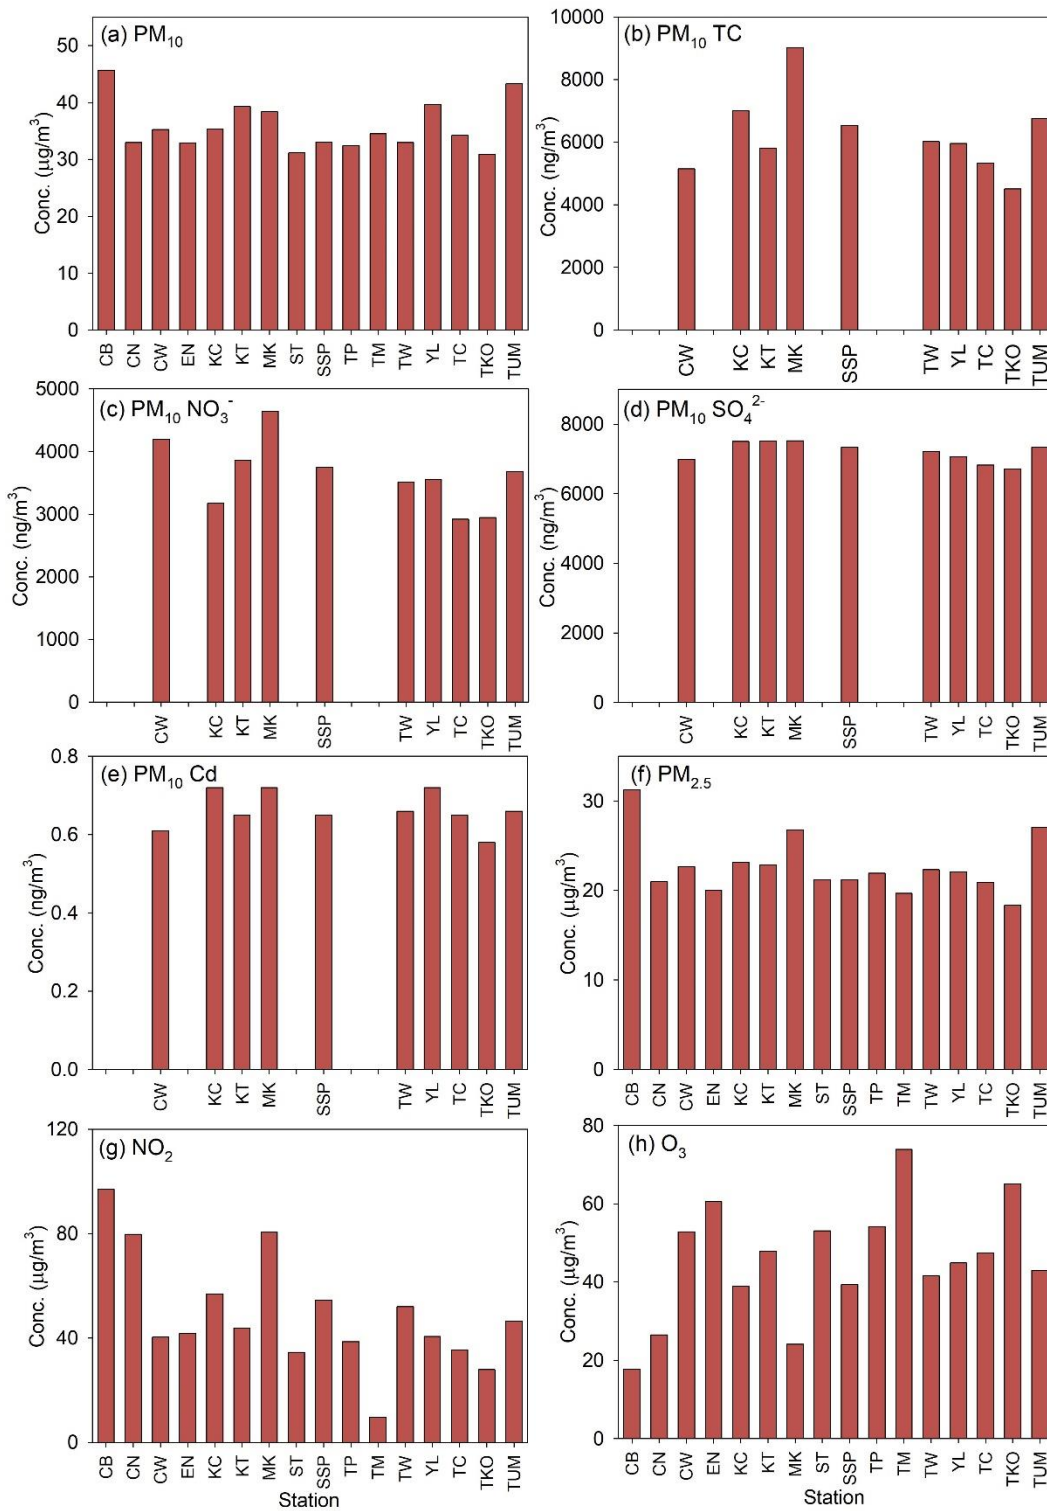

90 **Figure S3.** Annual-average concentration of  $PM_{10}$ ,  $PM_{2.5}$ ,  $NO_2$ ,  $O_3$ , and four major  $PM_{10}$  chemical species at general and roadside stations.

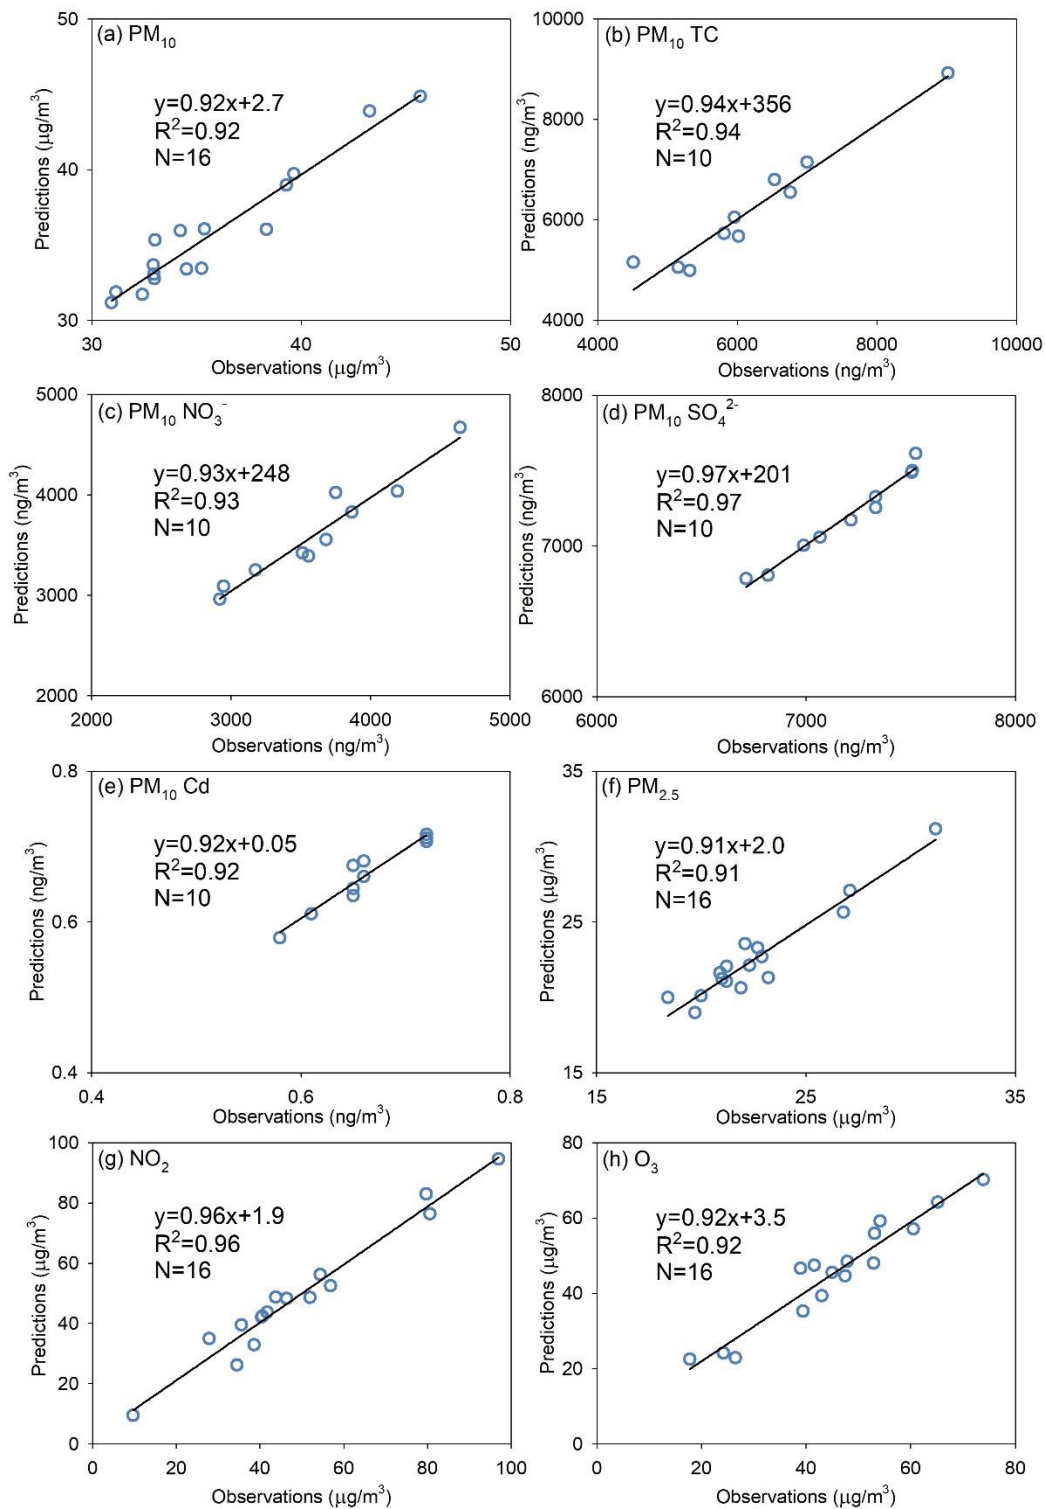

**Figure S4.** A comparison of LUR-predicted concentration and observed concentration of the studied air pollutants.

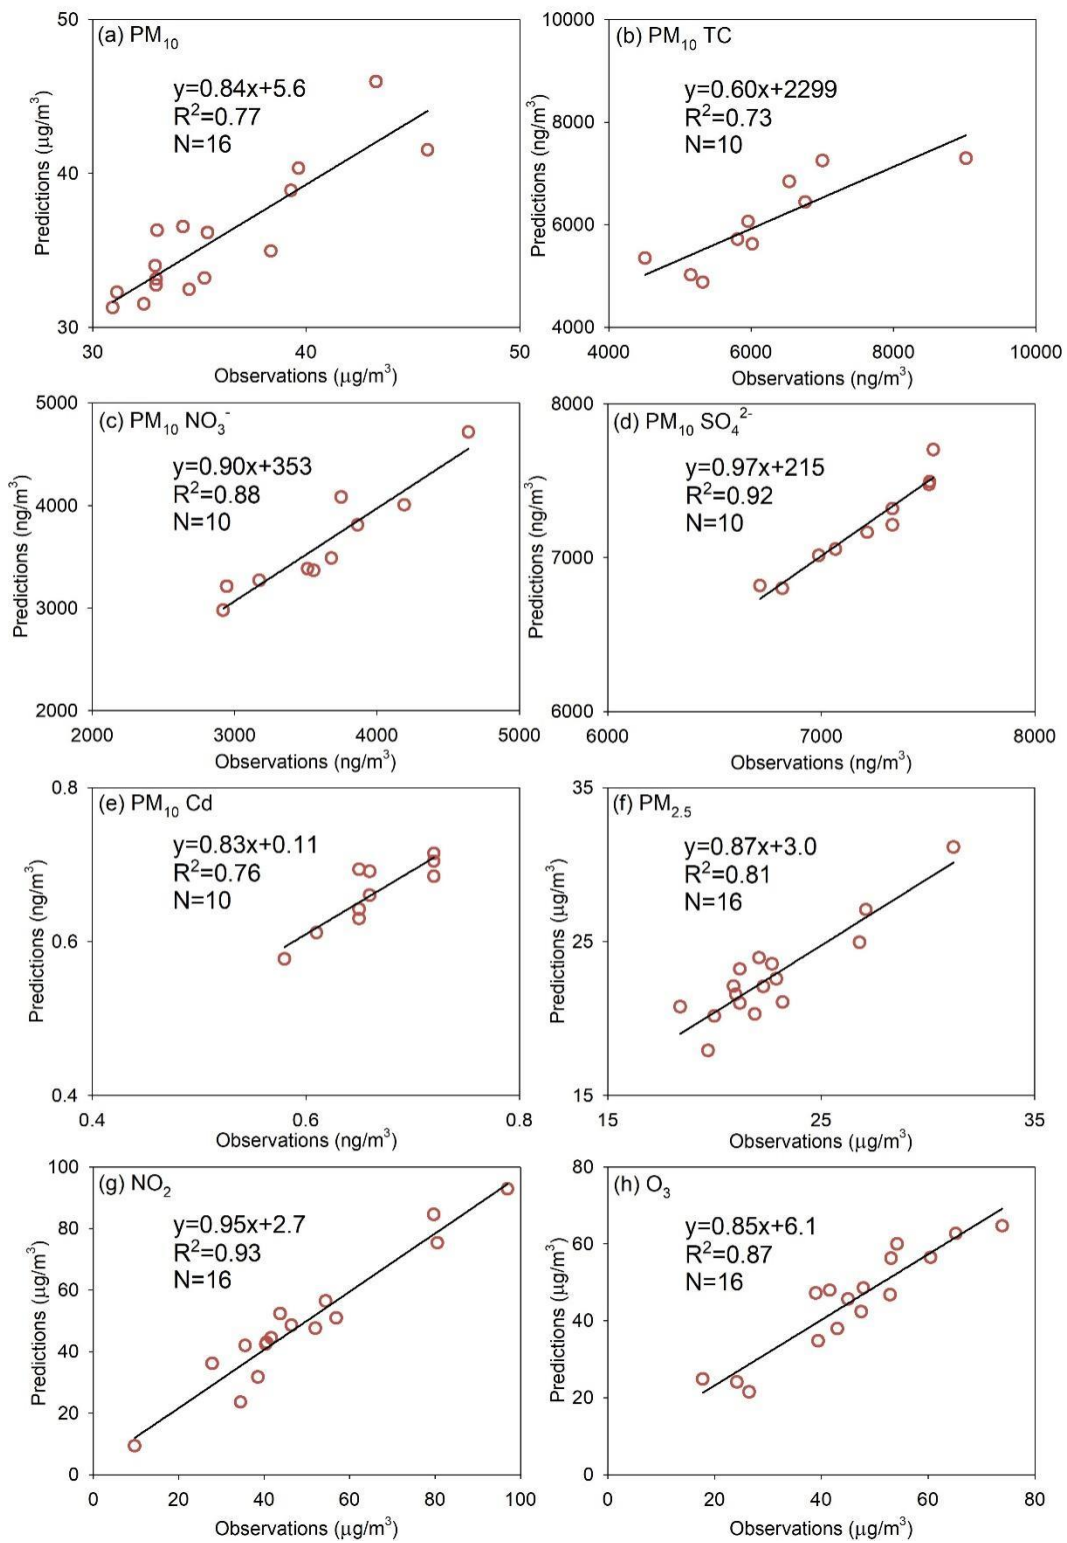

**Figure S5.** A comparison of LOOCV-predicted concentration and observed concentration of the studied air pollutants.

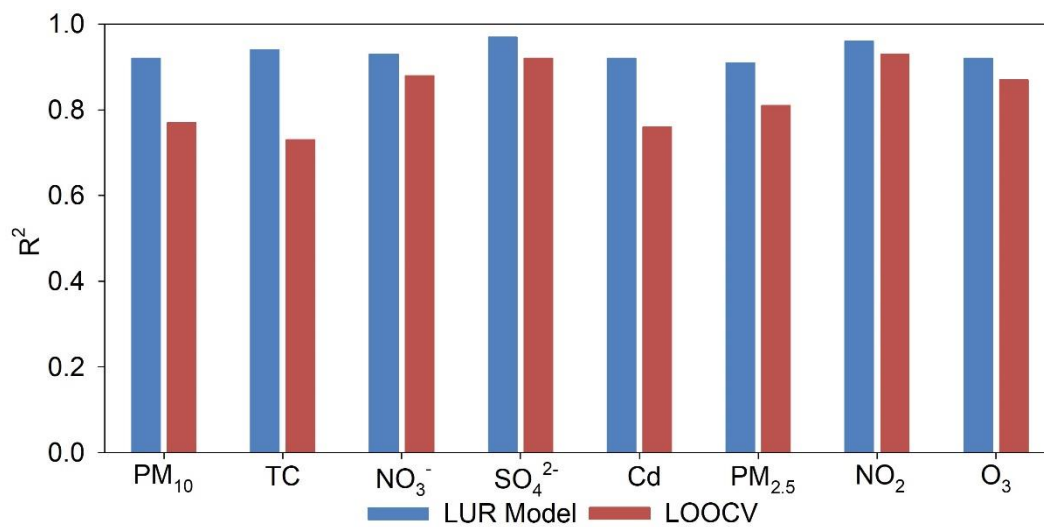

**Figure S6.** The model and leave-one-out cross-validation (LOOCV)  $R^2$  values for PM<sub>10</sub>, PM<sub>10</sub> TC, PM<sub>10</sub> NO<sub>3</sub><sup>-</sup>, PM<sub>10</sub> SO<sub>4</sub><sup>2-</sup>, PM<sub>10</sub> Cd, PM<sub>2.5</sub>, NO<sub>2</sub>, and O<sub>3</sub>. All the established models were statistically significant.

100

(a)

| Air pollutants                                 | Moran's Index | z-score | p-value | Interpretation                                           |
|------------------------------------------------|---------------|---------|---------|----------------------------------------------------------|
| PM <sub>10</sub>                               | -0.048        | 0.399   | 0.689   | Do not appear to be significantly different than random. |
| PM <sub>10</sub> TC                            | -0.163        | -0.249  | 0.804   |                                                          |
| PM <sub>10</sub> NO <sub>3</sub> <sup>-</sup>  | -0.012        | 0.453   | 0.650   |                                                          |
| PM <sub>10</sub> SO <sub>4</sub> <sup>2-</sup> | -0.184        | -0.504  | 0.615   |                                                          |
| PM <sub>10</sub> Cd                            | -0.292        | -0.843  | 0.399   |                                                          |
| PM <sub>2.5</sub>                              | -0.122        | -0.571  | 0.568   |                                                          |
| NO <sub>2</sub>                                | 0.025         | 0.935   | 0.350   |                                                          |
| O <sub>3</sub>                                 | 0.051         | 1.186   | 0.236   |                                                          |

(b)

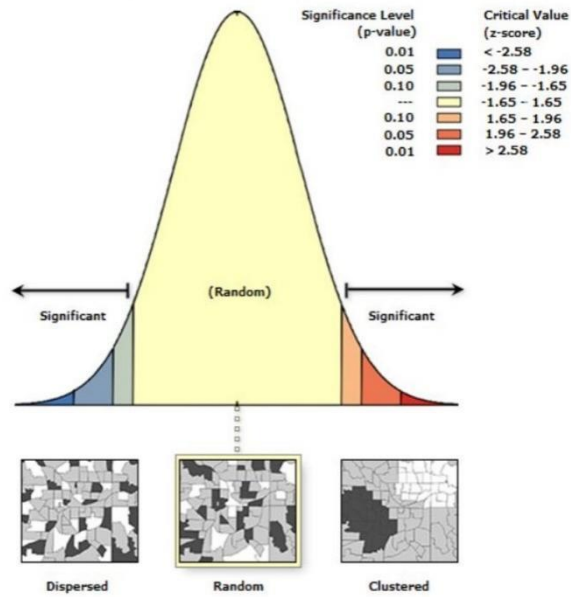

**Figure S7.** Moran's *I* index values of concentration residuals for the LUR models. (a) The spatial autocorrelation analysis results using the ArcGIS software. (b) The definition of Moran's *I* analysis results.



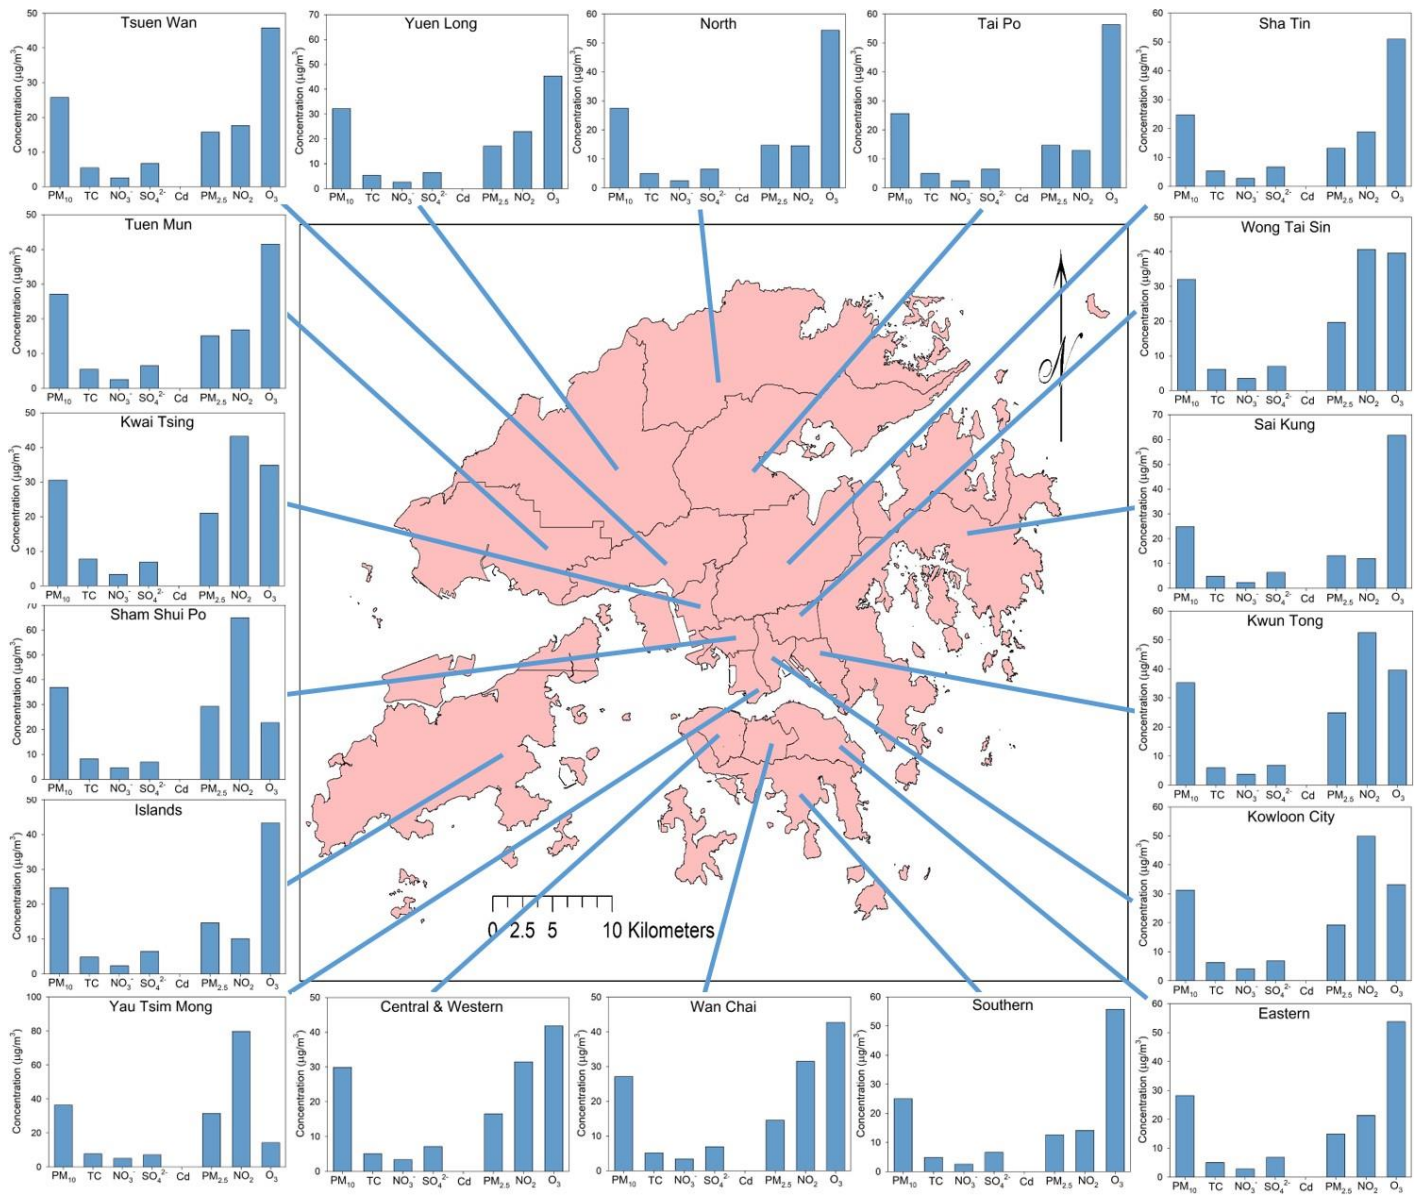

**Figure S8.** The distribution of the average LUR estimated ambient  $\text{PM}_{10}$ ,  $\text{PM}_{2.5}$ ,  $\text{NO}_2$ ,  $\text{O}_3$  ( $\mu\text{g}/\text{m}^3$ ), and  $\text{PM}_{10}$  TC,  $\text{PM}_{10}$   $\text{NO}_3^-$ ,  $\text{PM}_{10}$   $\text{SO}_4^{2-}$ ,  $\text{PM}_{10}$  Cd ( $\text{ng}/\text{m}^3$ ) in the eighteen districts of Hong Kong.

## References

- 110 Cai, J., Ge, Y., Li, H., Yang, C., Liu, C., Meng, X., Wang, W., Niu, C., Kan, L., Schikowski, T., and Yan, B.: Application of land use regression to assess exposure and identify potential sources in PM<sub>2.5</sub>, BC, NO<sub>2</sub> concentrations. *Atmos. Environ.* 223, 117267, 2020.
- Cordioli, M., Pironi, C., De Munari, E., Marmiroli, N., Lauriola, P., and Ranzi, A.: Combining land use regression models and fixed site monitoring to reconstruct spatiotemporal variability of NO<sub>2</sub> concentrations over a wide geographical area. *Sci. Total Environ.* 574, 1075-1084, 2017.
- 115 Cowie, C.T., Garden, F., Jegasothy, E., Knibbs, L.D., Hanigan, I., Morley, D., Hansell, A., Hoek, G., and Marks, G.B.: Comparison of model estimates from an intra-city land use regression model with a national satellite-LUR and a regional Bayesian Maximum Entropy model, in estimating NO<sub>2</sub> for a birth cohort in Sydney, Australia. *Environ. Res.* 174, 24-34, 2019.
- Hoek, G., Beelen, R., De Hoogh, K., Vienneau, D., Gulliver, J., Fischer, P., and Briggs, D.: A review of land-use regression models to assess spatial variation of outdoor air pollution. *Atmos. Environ.* 42(33), 7561-7578, 2008.
- 120 Huang, L., Zhang, C., and Bi, J.: Development of land use regression models for PM<sub>2.5</sub>, SO<sub>2</sub>, NO<sub>2</sub> and O<sub>3</sub> in Nanjing, China. *Environ. Res.* 158, 542-552, 2017.
- Jin, L., Berman, J.D., Warren, J.L., Levy, J.I., Thurston, G., Zhang, Y., Xu, X., Wang, S., Zhang, Y., and Bell, M.L.: A land use regression model of nitrogen dioxide and fine particulate matter in a complex urban core in Lanzhou, China. *Environ. Res.* 177, 108597, 2019.
- 125 Jones, R.R., Hoek, G., Fisher, J.A., Hasheminassab, S., Wang, D., Ward, M.H., Sioutas, C., Vermeulen, R., and Silverman, D.T.: Land use regression models for ultrafine particles, fine particles, and black carbon in southern California. *Sci. Total Environ.* 699, 134234, 2020.
- Lee, M., Brauer, M., Wong, P., Tang, R., Tsui, T.H., Choi, C., Cheng, W., Lai, P.C., Tian, L., Thach, T.Q., and Allen, R.: Land use regression modelling of air pollution in high density high rise cities: A case study in Hong Kong. *Sci Total Environ.* 592, 306-315, 2017.
- 130 Li, R., Ma, T., Xu, Q., and Song, X.: Using MAIAC AOD to verify the PM<sub>2.5</sub> spatial patterns of a land use regression model. *Environ. Pollut.* 243, 501-509, 2018.
- Li, Z., Ho, K.F., Chuang, H.C., and Yim, S.H.L.: Development and intercity transferability of land-use regression models for predicting ambient PM<sub>10</sub>, PM<sub>2.5</sub>, NO<sub>2</sub> and O<sub>3</sub> concentrations in northern Taiwan. *Atmos. Chem. Phys.* 21, 5063–5078, 2021.
- 135 Liu, C., Henderson, B.H., Wang, D., Yang, X., and Peng, Z.R.: A land use regression application into assessing spatial variation of intra-urban fine particulate matter (PM<sub>2.5</sub>) and nitrogen dioxide (NO<sub>2</sub>) concentrations in City of Shanghai, China. *Sci. Total Environ.* 565, 607-615, 2016.
- Luminati, O., de Campos, B.L.D.A., Flückiger, B., Brentani, A., Röösl, M., Fink, G., and de Hoogh, K.: Land use regression modelling of NO<sub>2</sub> in Sao Paulo, Brazil. *Environ. Pollut.* 289, 117832, 2021.
- 140 Ma, X., Longley, I., Gao, J., Kachhara, A., and Salmond, J.: A site-optimised multi-scale GIS based land use regression model for simulating local scale patterns in air pollution. *Sci. Total Environ.* 685, 134-149, 2019.
- Meng, X., Chen, L., Cai, J., Zou, B., Wu, C.F., Fu, Q., Zhang, Y., Liu, Y., and Kan, H.: A land use regression model for estimating the NO<sub>2</sub> concentration in Shanghai, China. *Environ. Res.* 137, 308-315, 2015.
- 145 Meng, X., Fu, Q., Ma, Z., Chen, L., Zou, B., Zhang, Y., Xue, W., Wang, J., Wang, D., Kan, H., and Liu, Y.: Estimating ground-level PM<sub>10</sub> in a Chinese city by combining satellite data, meteorological information and a land use regression model. *Environ. Pollut.* 208, 177-184, 2016.
- Miri, M., Ghassoun, Y., Dovlatbadi, A., Ebrahimnejad, A., and Löwner, M.O.: Estimate annual and seasonal PM<sub>1</sub>, PM<sub>2.5</sub> and PM<sub>10</sub> concentrations using land use regression model. *Ecotoxicol. Environ. Saf.* 174, 137-145, 2019.
- 150 Mölter, A., and Lindley, S.: Developing land use regression models for environmental science research using the XLUR tool—More than a one-trick pony. *Environ. Model. Softw.* 143, 105108, 2021.
- Naughton, O., Donnelly, A., Nolan, P., Pilla, F., Misstear, B.D., and Broderick, B.: A land use regression model for explaining spatial variation in air pollution levels using a wind sector based approach. *Sci. Total Environ.* 630, 1324-1334, 2018.
- 155 Son, Y., Osornio-Vargas, Á.R., O'Neill, M.S., Hystad, P., Texcalac-Sangrador, J.L., Ohman-Strickland, P., Meng, Q., and Schwander, S.: Land use regression models to assess air pollution exposure in Mexico City using finer spatial and temporal input parameters. *Sci. Total Environ.* 639, 40-48, 2018.

Wang, J., Cohan, D.S., and Xu, H.: Spatiotemporal ozone pollution LUR models: Suitable statistical algorithms and time scales for a megacity scale. *Atmos. Environ.* 237, 117671, 2020.

Wolf, K., Cyrus, J., Hrciníková, T., Gu, J., Kusch, T., Hampel, R., Schneider, A., and Peters, A.: Land use regression modeling of ultrafine particles, ozone, nitrogen oxides and markers of particulate matter pollution in Augsburg, Germany. *Sci. Total Environ.* 579, 1531-1540, 2017.

Xu, M., Sbihi, H., Pan, X., and Brauer, M.: Local variation of PM<sub>2.5</sub> and NO<sub>2</sub> concentrations within metropolitan Beijing. *Atmos. Environ.* 200, 254-263, 2019.

160
